# Supplementary material
Source: HighWire-hosted journal article supplement (http://cmajopen.ca/highwire/filestream/81319/field_highwire_adjunct_files/0/2019-0011-1-at.pdf)
Supplement: 2019-0011-1-at.pdf [file 2019-0011-1-at.pdf]

**Appendix 1 (as supplied by the authors): Supplementary material**

**Supplementary Table S1: TDP drugs by drug groups.**

| <b>Cytotoxic chemotherapy</b> | <b>LHRH agonist</b> | <b>Aromatase inhibitor</b> | <b>Antiandrogen</b> | <b>Supportive therapy</b>                     |
|-------------------------------|---------------------|----------------------------|---------------------|-----------------------------------------------|
| asparaginase                  | buserelin           | aminoglutethimide          | bicalutamide        | antidiarrheals                                |
| busulfan                      | goserelin           | anastrozole                | cyproterone         | antiemetics                                   |
| carmustine                    | leuprolide          | exemestane                 | flutamide           | bisphosphonates                               |
| chlorambucil                  | triptorelin         | letrozole                  | nilutamide          | corticosteroids                               |
| cladribine                    |                     |                            |                     | erythropoiesis-stimulating agents (ESA)       |
| cyclophosphamide              |                     |                            |                     | granulocyte colony-stimulating factors (GCSF) |
| cytarabine                    |                     |                            |                     | iron                                          |
| dacarbazine                   |                     |                            |                     | laxatives                                     |
| daunorubicin                  |                     |                            |                     | adjunct pain medications                      |
| epirubicin                    |                     |                            |                     | opiates                                       |
| estramustine                  |                     |                            |                     | somatostatins                                 |
| etoposide                     |                     |                            |                     |                                               |
| fludarabine                   |                     |                            |                     |                                               |
| fluorouracil                  |                     |                            |                     |                                               |
| hydroxyurea                   |                     |                            |                     |                                               |
| irinotecan                    |                     |                            |                     |                                               |
| lomustine                     |                     |                            |                     |                                               |
| mechlorethamine               |                     |                            |                     |                                               |
| melphalan                     |                     |                            |                     |                                               |
| mercaptopurine                |                     |                            |                     |                                               |
| methotrexate                  |                     |                            |                     |                                               |
| mitomycin                     |                     |                            |                     |                                               |
| mitotane                      |                     |                            |                     |                                               |

|              |  |  |  |  |
|--------------|--|--|--|--|
| procarbazine |  |  |  |  |
| thioguanine  |  |  |  |  |
| thiotepa     |  |  |  |  |
| vinblastine  |  |  |  |  |

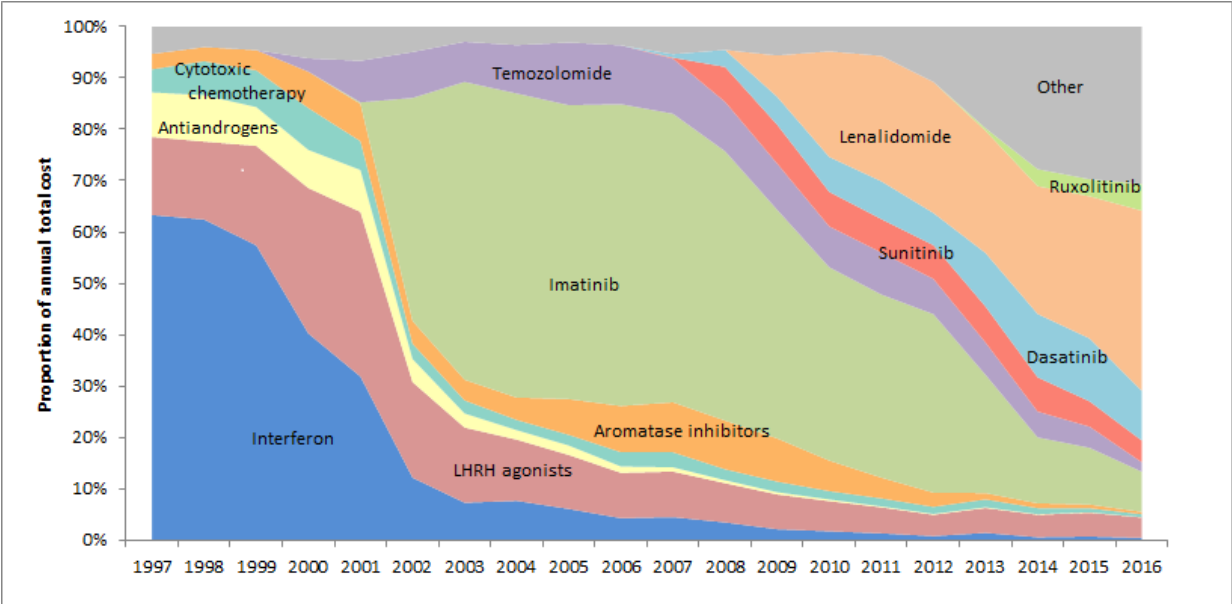

**Supplementary Figure S1: Proportion of total annual cost, highlighting select cancer treatment drugs in TDP, 1997-2016, adjusted for inflation to 2016.**
